# Supplementary material
Source: PubMed Central journal article supplement (PMC4297518)

**A** ILC2 Gating Scheme

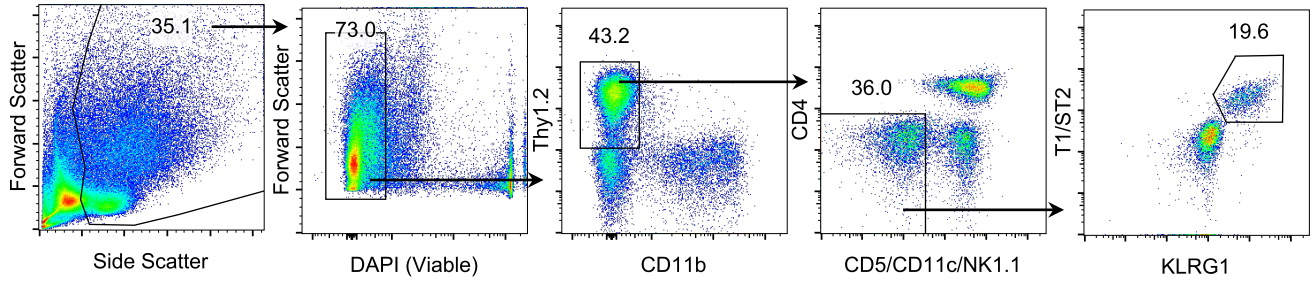

**B**

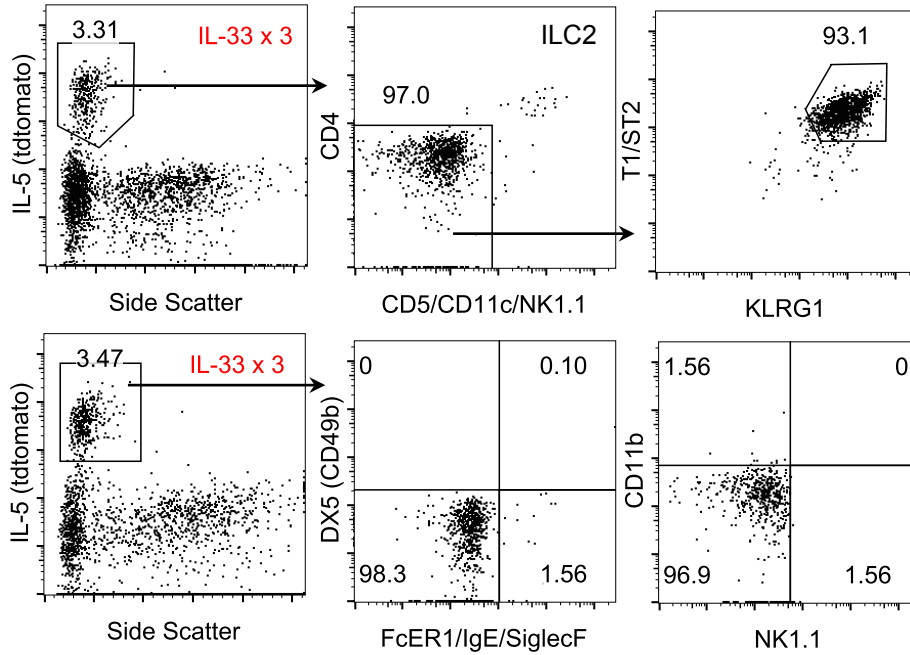

**C**

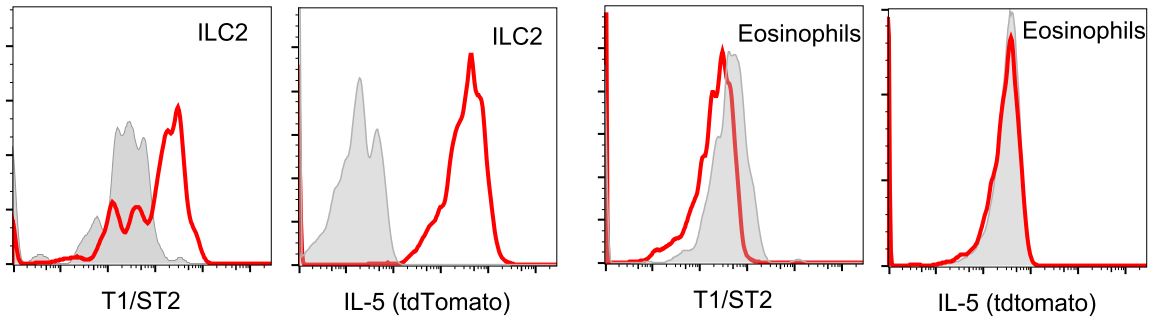

**D**

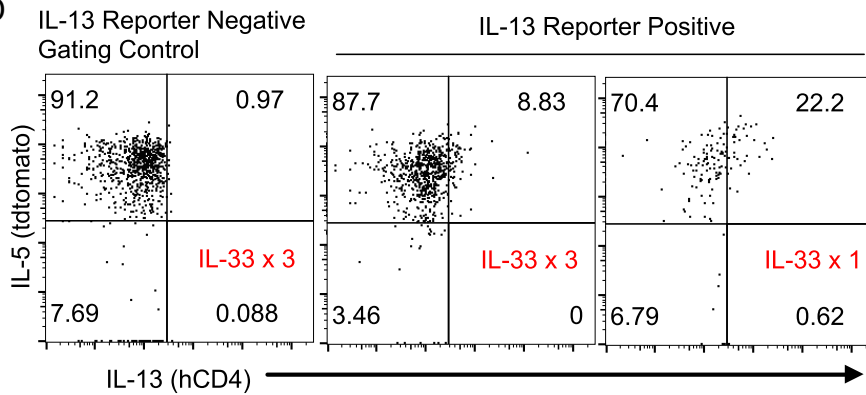

Supplement: NIHMS647465-supplement-1.pdf [file NIHMS647465-supplement-1.pdf]

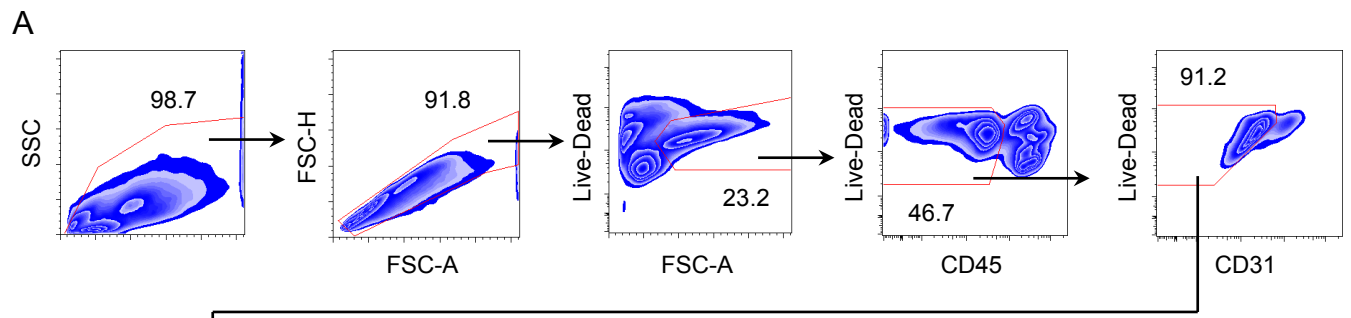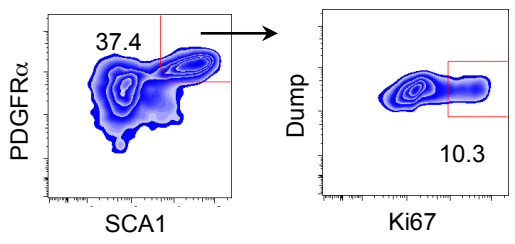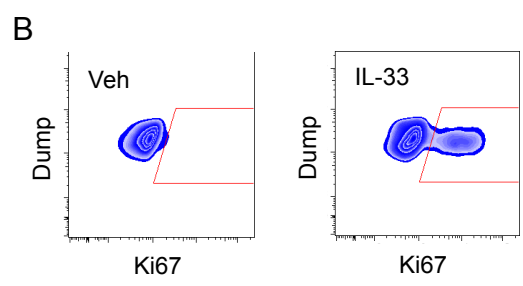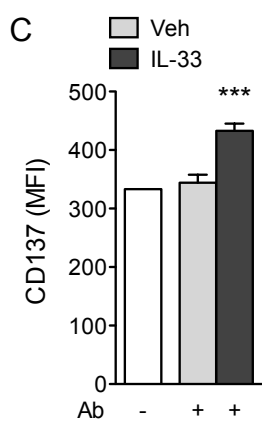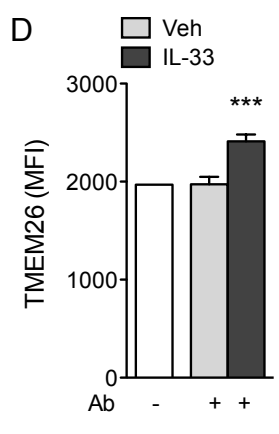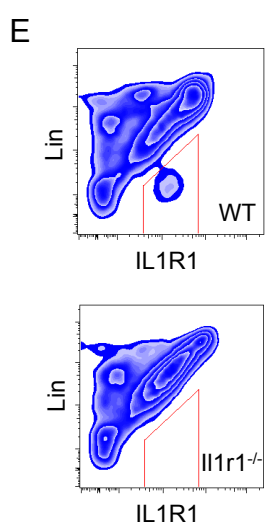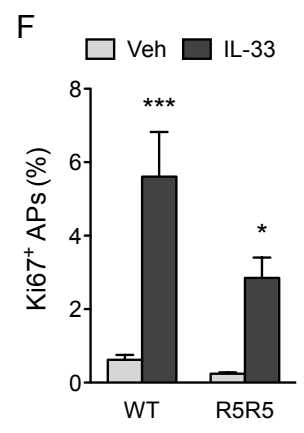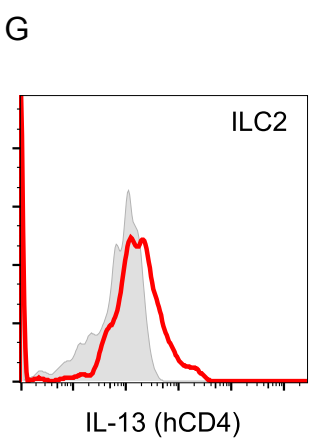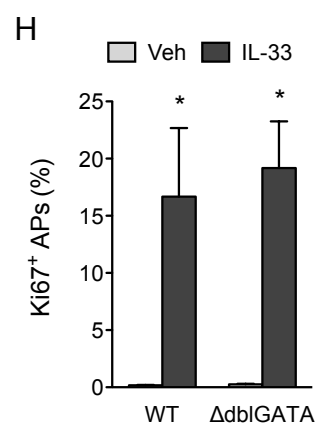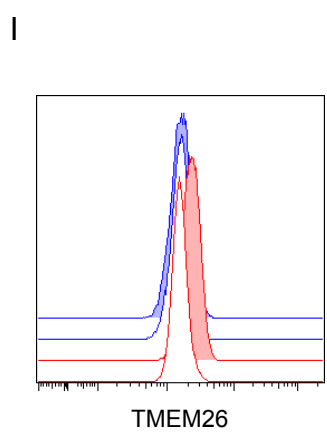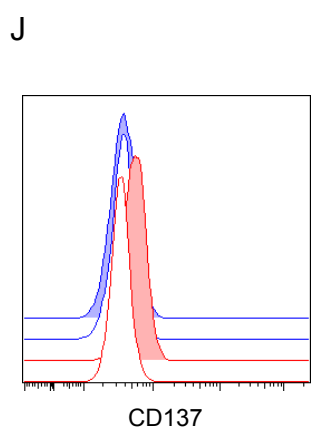

Supplement: NIHMS647465-supplement-2.pdf [file NIHMS647465-supplement-2.pdf]

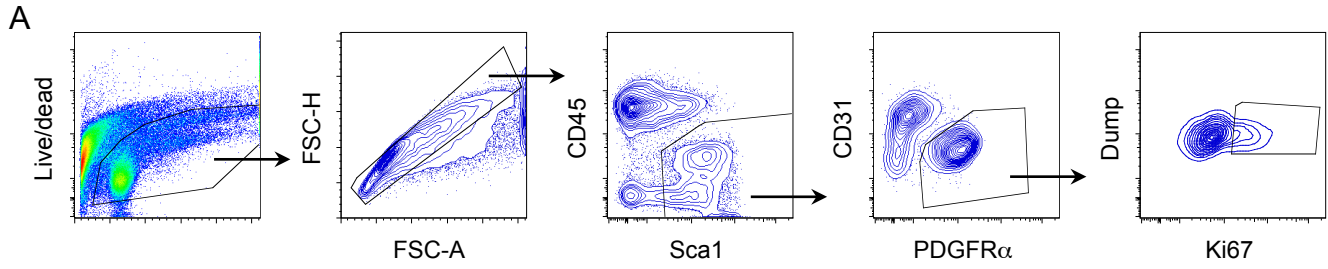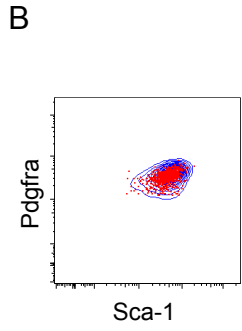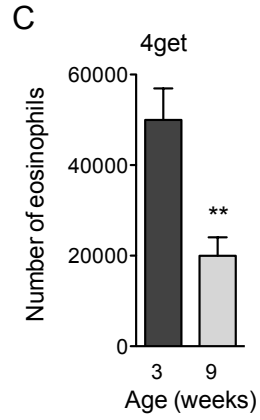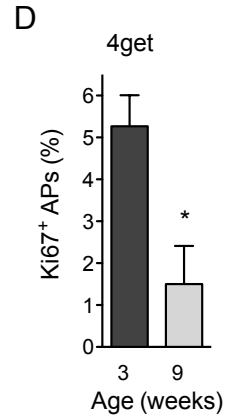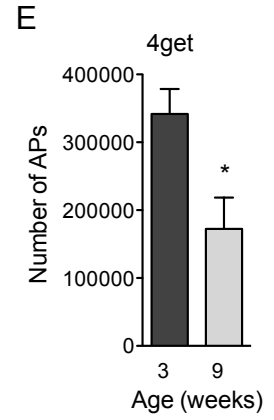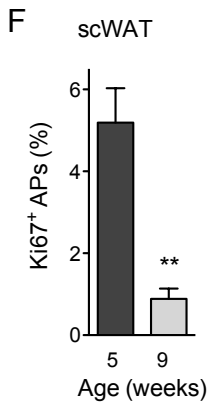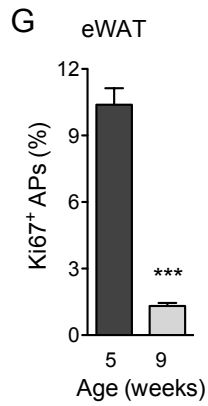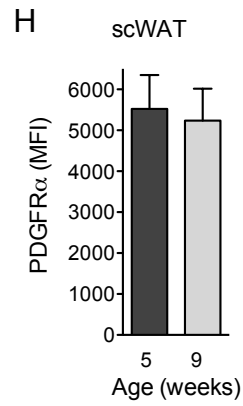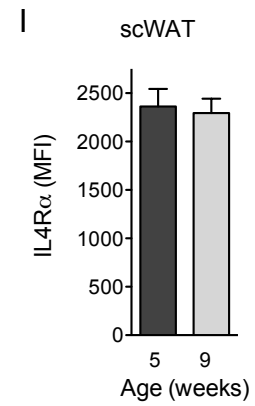

Supplement: NIHMS647465-supplement-3.pdf [file NIHMS647465-supplement-3.pdf]

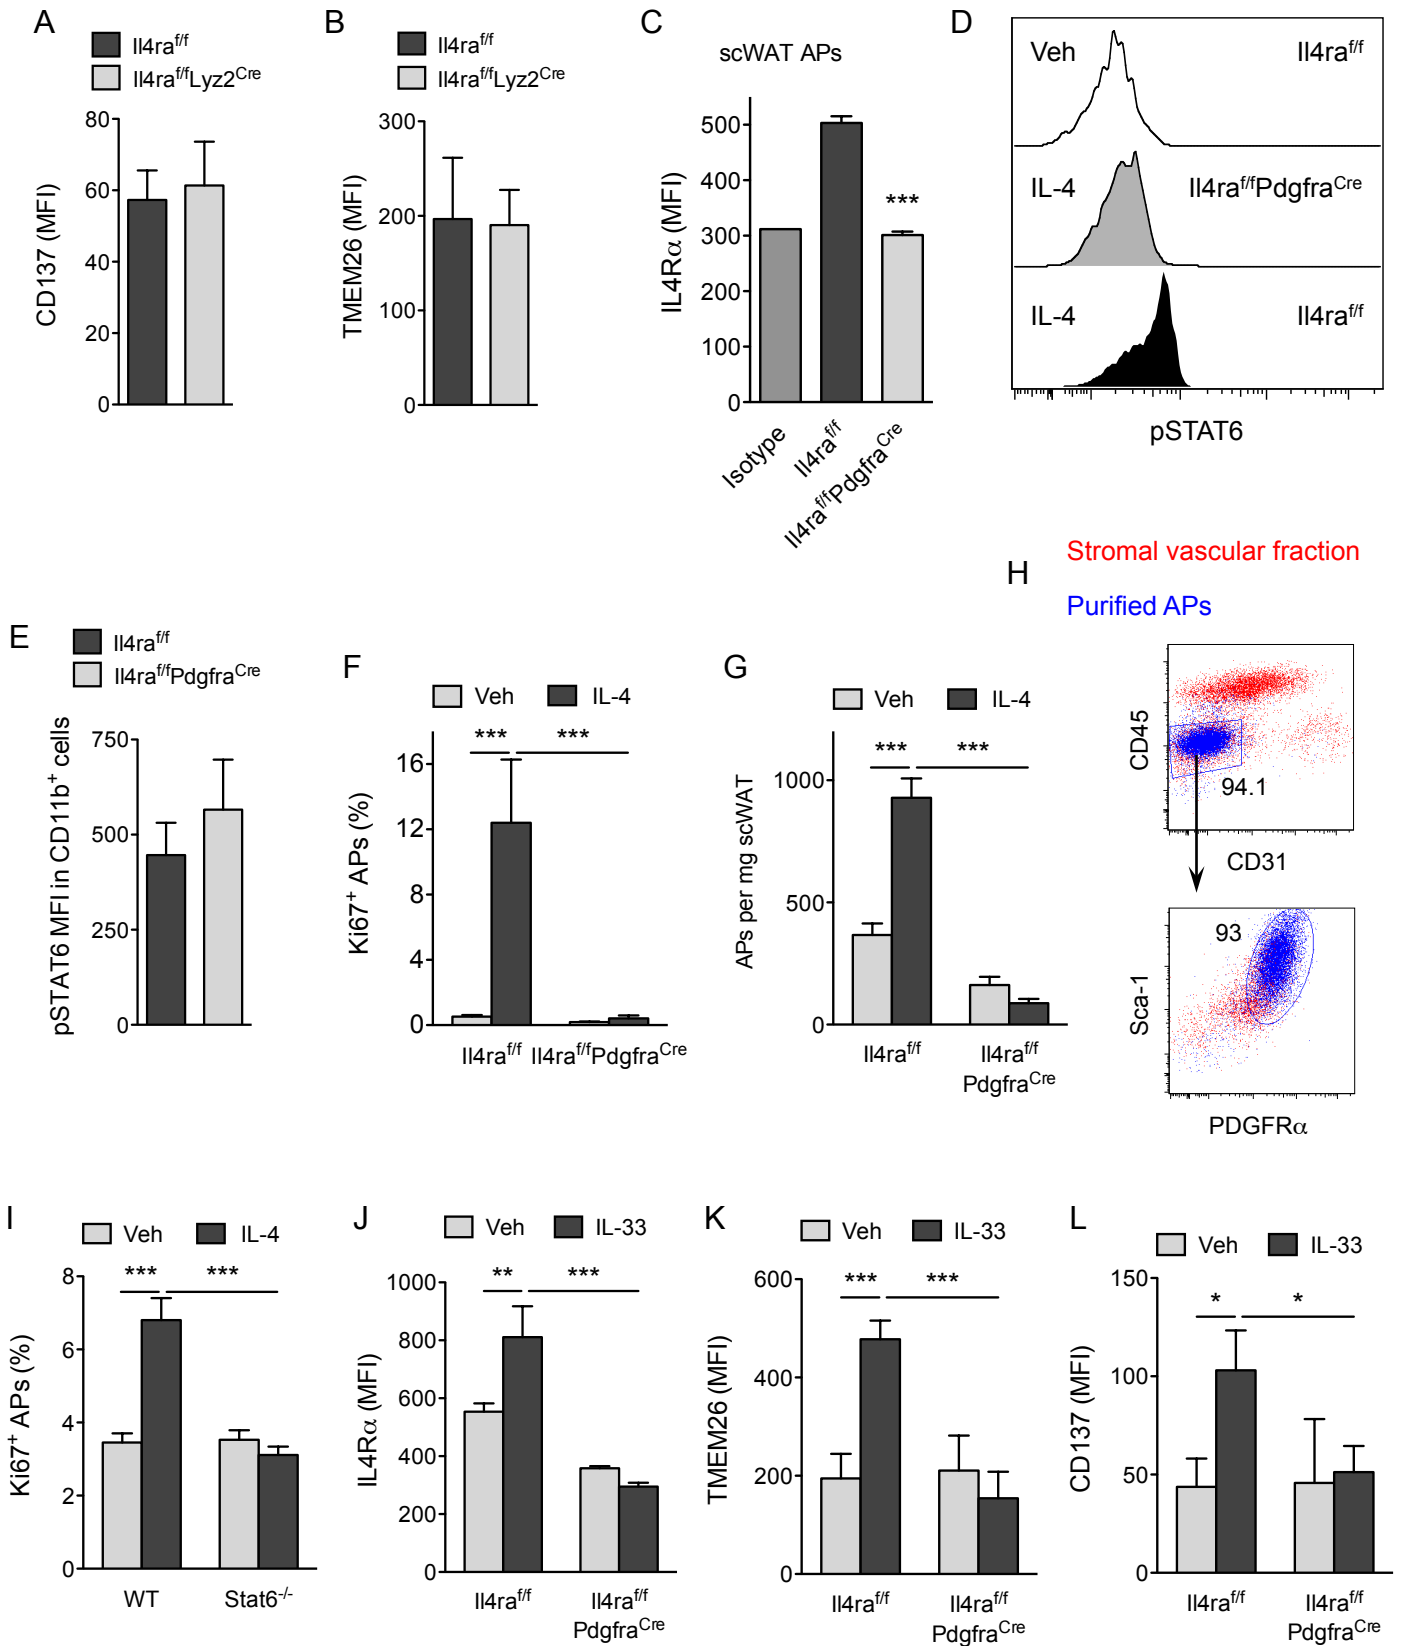

Supplement: NIHMS647465-supplement-4.pdf [file NIHMS647465-supplement-4.pdf]

**A**

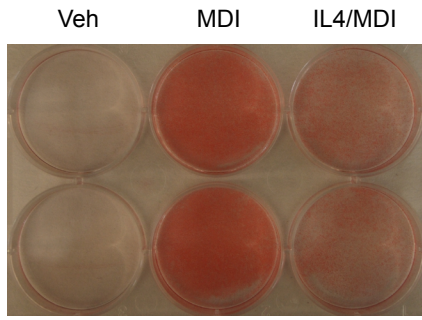

**B**

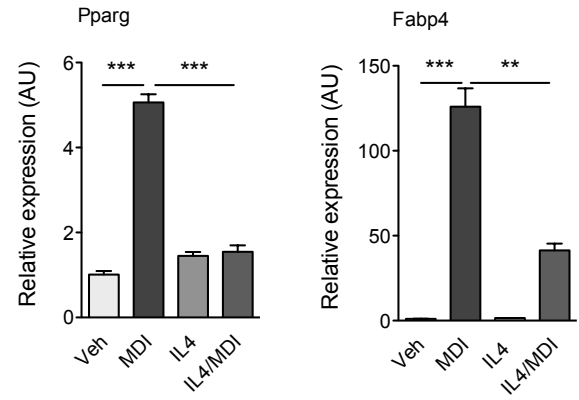

**C**

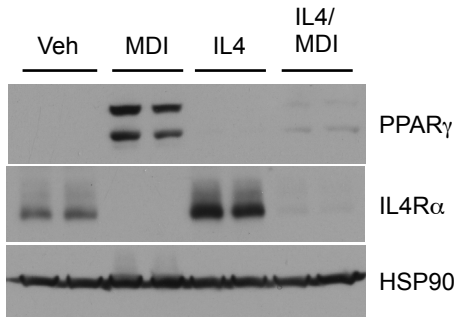

**D**

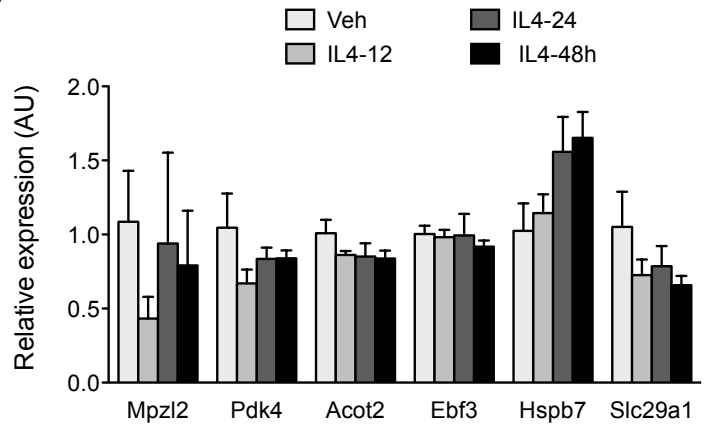

Supplement: NIHMS647465-supplement-5.pdf [file NIHMS647465-supplement-5.pdf]

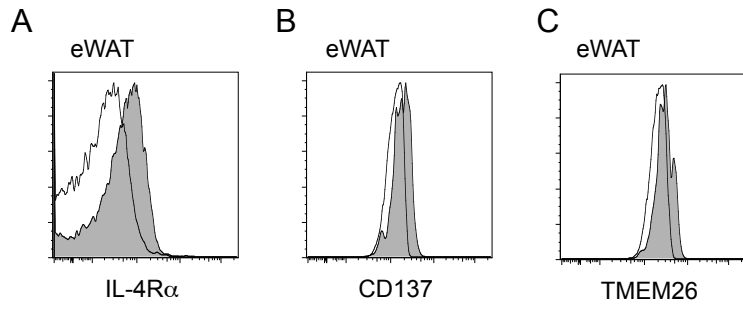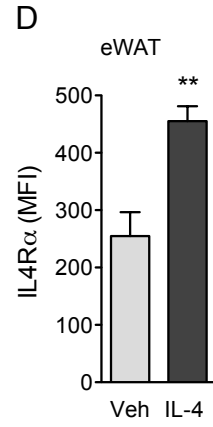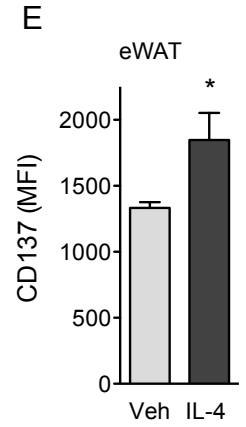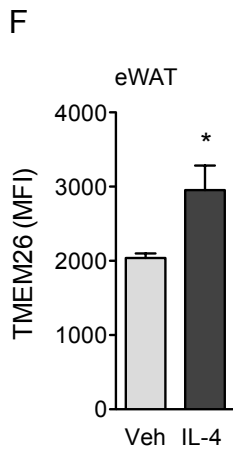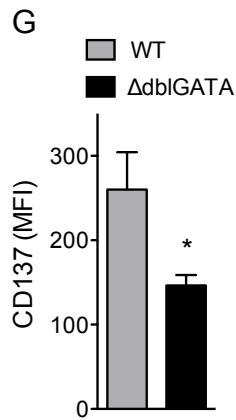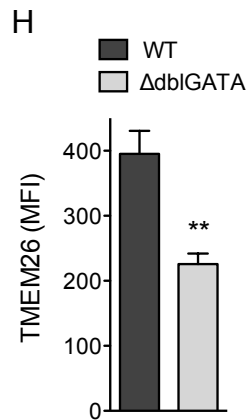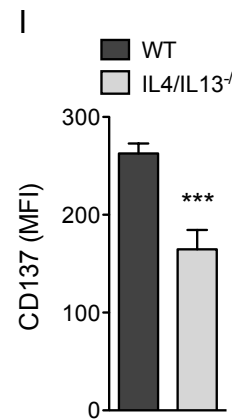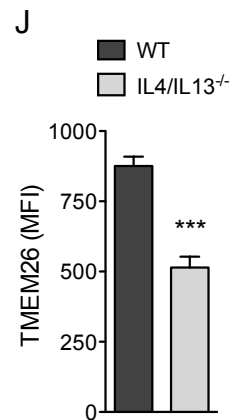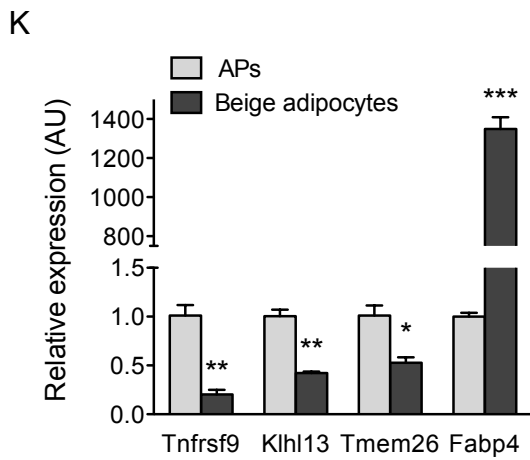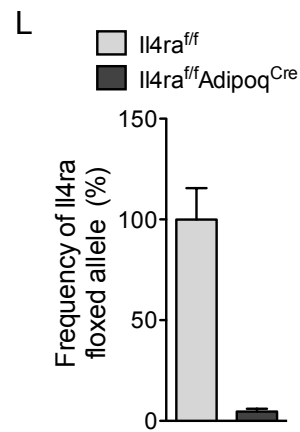

Supplement: NIHMS647465-supplement-6.pdf [file NIHMS647465-supplement-6.pdf]
